# Supplementary material
Source: MDPI journal article supplement (https://www.mdpi.com/2079-9284/4/4/51)
Supplement: s1 [file s1]

# Supplementary Materials: Whitening Agents from *Reseda luteola* L. and Their Chemical Characterization Using Combination of CPC, UPLC-HRMS and NMR

Pauline Burger, André Monchot, Olivier Bagarri, Philippe Chiffolleau, Stéphane Azoulay, Xavier Fernandez and Thomas Michel

**Supplementary data 1.** The distribution coefficients  $K_d$  and separation factors  $\alpha$  of the 4 major compounds detected in RL3-MeOH sub-extract in different solvent systems (peak identification as in Table 2).

| Solvent system                                                       | Molecule | $K_d$ | $\alpha$ |
|----------------------------------------------------------------------|----------|-------|----------|
| ethyl acetate/water/ethanol/acetic acid<br>(4/5/1/0.2)               | 2        | 1.6   | 1.4      |
|                                                                      | 3        | 8.0   | 1.1      |
|                                                                      | 14       | 46.8  | 2.4      |
|                                                                      | 17       | 113.6 | 1.2      |
| chloroform/methanol/water<br>(4/3/2)                                 | 2        | 16.6  | 3.8      |
|                                                                      | 3        | 4.4   | 4.0      |
|                                                                      | 14       | 1.1   | 2.5      |
|                                                                      | 17       | 0.4   | 1.5      |
| chloroform/methanol/water<br>(8/4/5)                                 | 2        | 80.7  | 8.1      |
|                                                                      | 3        | 20.4  | 1.8      |
|                                                                      | 14       | 1.9   | 6.1      |
|                                                                      | 17       | 0.3   | 2.8      |
| n-hexane/ethyl acetate/methanol/water/acetic acid<br>(5/3/3.5/5/0.2) | 2        | /     | /        |
|                                                                      | 3        | 0.0   | /        |
|                                                                      | 14       | 0.1   | 2.6      |
|                                                                      | 17       | 0.3   | 1.2      |
| ethyl acetate/water/ethanol<br>(4/5/1)                               | 2        | 1.8   | 1.4      |
|                                                                      | 3        | 3.8   | 1.0      |
|                                                                      | 14       | 4.6   | 1.2      |
|                                                                      | 17       | 5.3   | 1.1      |
| ethyl acetate/water/ethanol/acetic acid<br>(4/5/1/0.25)              | 2        | 1.7   | 1.8      |
|                                                                      | 3        | 8.5   | 1.1      |
|                                                                      | 14       | 66.9  | 2.3      |
|                                                                      | 17       | 153.8 | 1.1      |
| n-hexane/water/butanol<br>(1/2/1)                                    | 2        | 0.3   | 2.1      |
|                                                                      | 3        | 0.6   | 1.4      |
|                                                                      | 14       | 1.0   | 1.3      |
|                                                                      | 17       | 1.3   | 1.3      |

**Supplementary data 2.** CPC chromatograms at 254 nm (in black) and 280 nm (in orange) of the RL3-MeOH sub-extract fractionation: 90 tubes collected and gathered together following the CPC chromatogram to obtain 18 fractions, named RL3-F1 to RL3-F18 respectively.

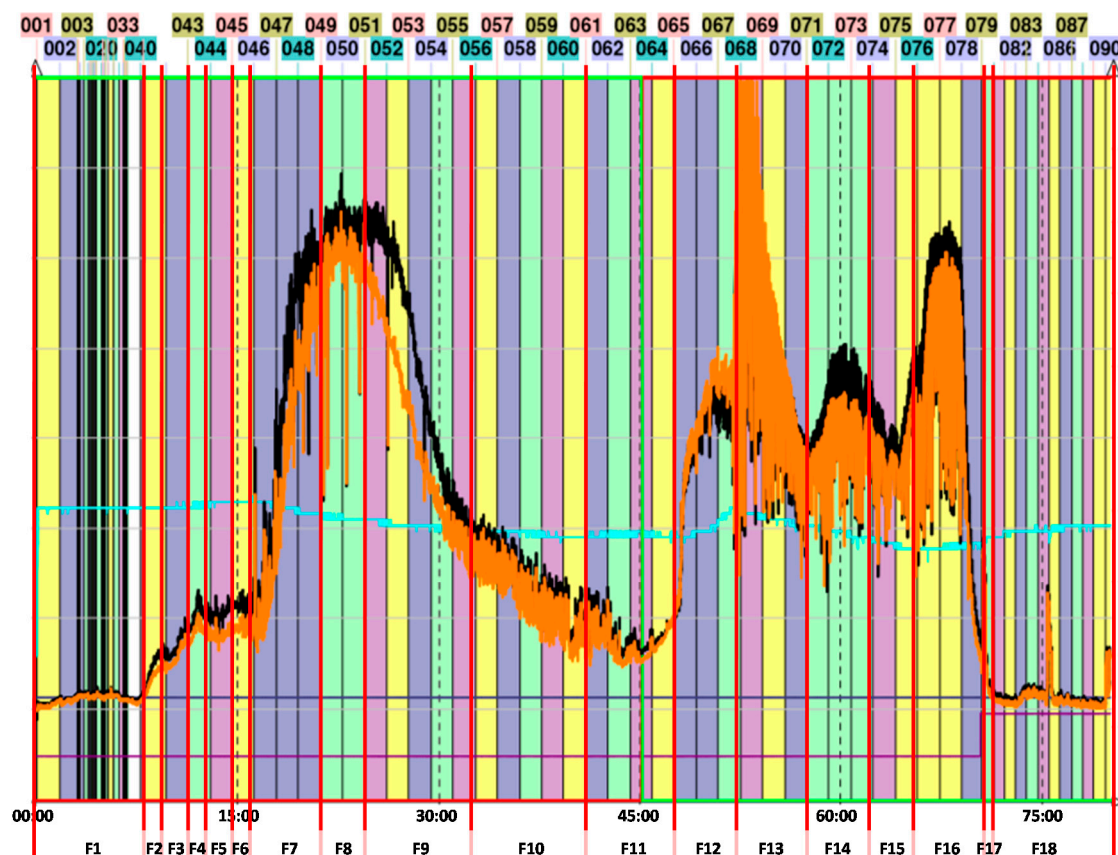

(colour online only).

**Supplementary material 3** HRESIMS and  $^1\text{H}$ -NMR data obtained for compounds 14 and 17, corresponding respectively to luteolin and apigenin [1].

**Compound 14 (F9)** HRESIMS  $m/z$  287 ( $[\text{M}+\text{H}]^+$ , corresponding to  $\text{C}_{15}\text{H}_{11}\text{O}_6$ );  $^1\text{H}$ -NMR (200 MHz,  $\text{d}_6$ -DMSO): 6.25 (1H, d,  $J = 2$  Hz), 6.43 (1H, d,  $J = 2$  Hz), 6.67 (1H, s), 6.9 (1H, d,  $J = 8$  Hz), 7.39 (1H, s), 7.43 (1H, d,  $J = 2$  Hz), 12.99 (1H, s). A COSY correlation confirms the coupling of the proton at  $\delta_{\text{H}}$  7.39 with those at  $\delta_{\text{H}}$  6.9 and 7.43.

**Compound 17 (F13)** HRESIMS  $m/z$  271 ( $[\text{M} + \text{H}]^+$ , corresponding to  $\text{C}_{15}\text{H}_{11}\text{O}_5$ );  $^1\text{H}$ -NMR (200 MHz,  $\text{d}_6$ -acetone): 6.3 (1H, d,  $J = 2$  Hz), 6.5 (1H, d,  $J = 2$  Hz), 6.6 (1H, s), 7 (2H, d,  $J = 9$  Hz), 7.9 (2H, d,  $J = 9$  Hz).

## References

1. Chaturvedula, V.S.P.; Prakash, I. Flavonoids from *Astragalus propinquus*. *J. Chem. Pharm. Res.* **2013**, *5*, 261–265.

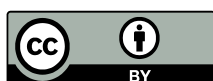

© 2017 by the authors. Submitted for possible open access publication under the terms and conditions of the Creative Commons Attribution (CC BY) license (<http://creativecommons.org/licenses/by/4.0/>).
